# Supplementary material
Source: publisher figshare collection journal article supplement (https://acs.figshare.com/ndownloader/files/4261084)
Supplement: Supplementary file 1 [file 4261084]

# Nonvolatile Memory Device Using Gold Nanoparticles Covalently Bound to Reduced Graphene Oxide

*Peng Cui, Sohyeon Seo, Junghyun Lee, Luyang Wang, Eunkyo Lee, Misook Min, Hyoyoung Lee\**

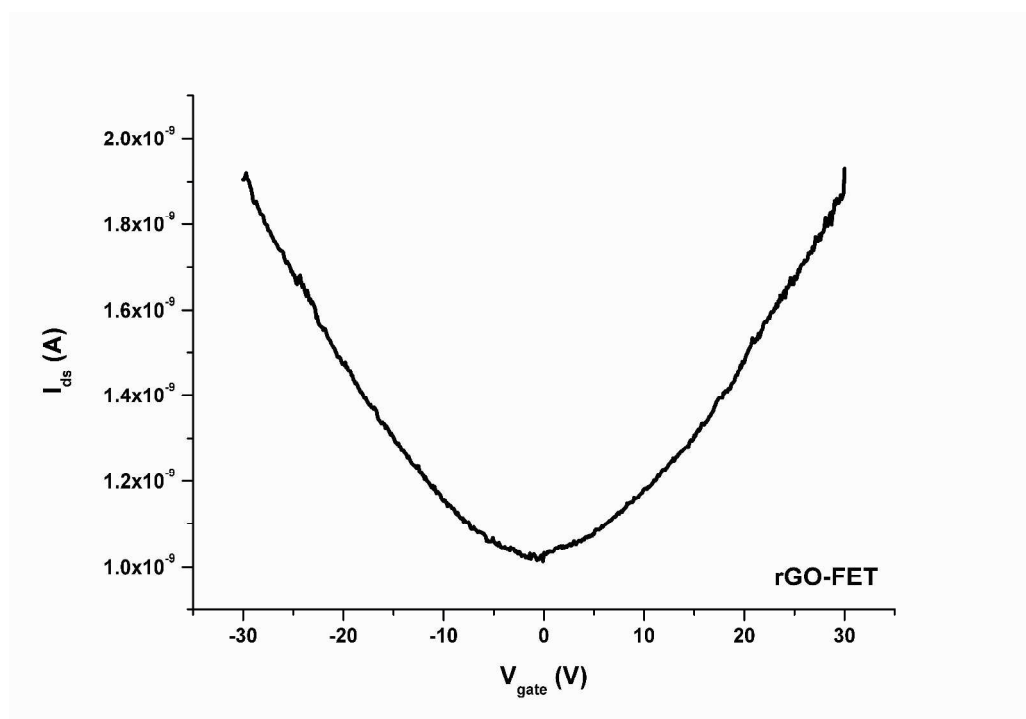

Figure S1. I-V characteristics of the bare rGO-FET device.

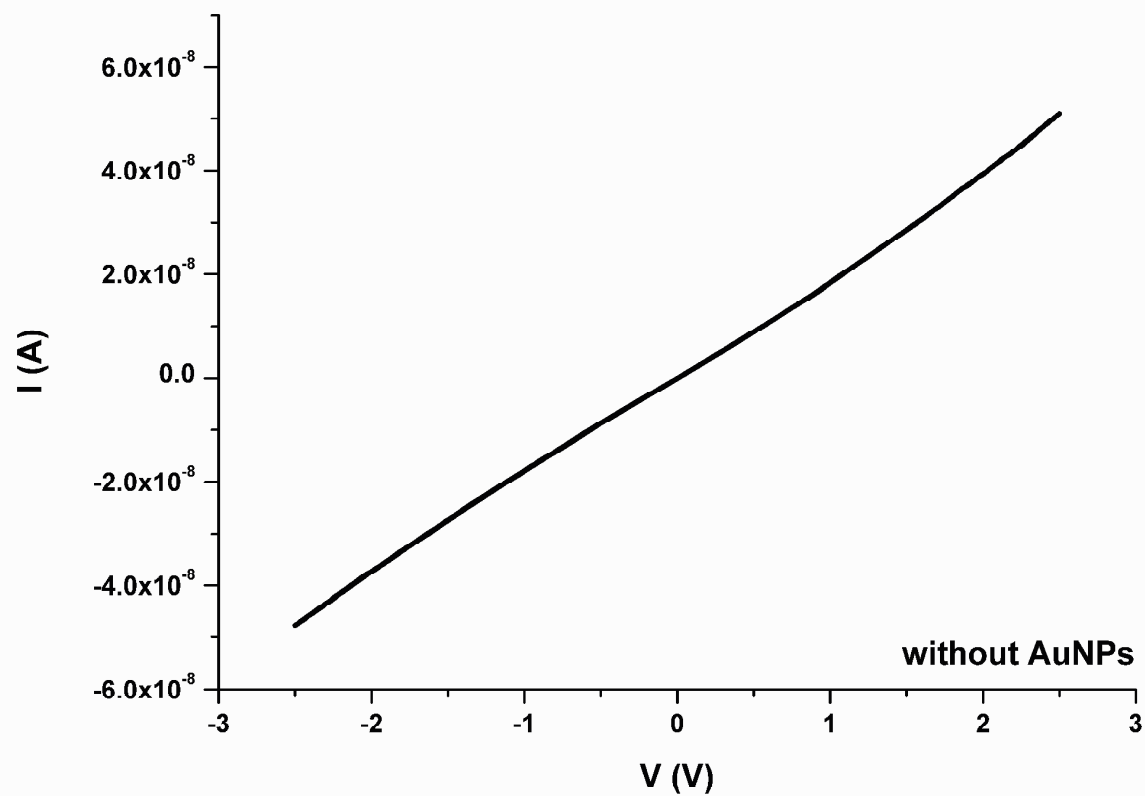

**Figure S2.** I-V characteristics of the frGO device.

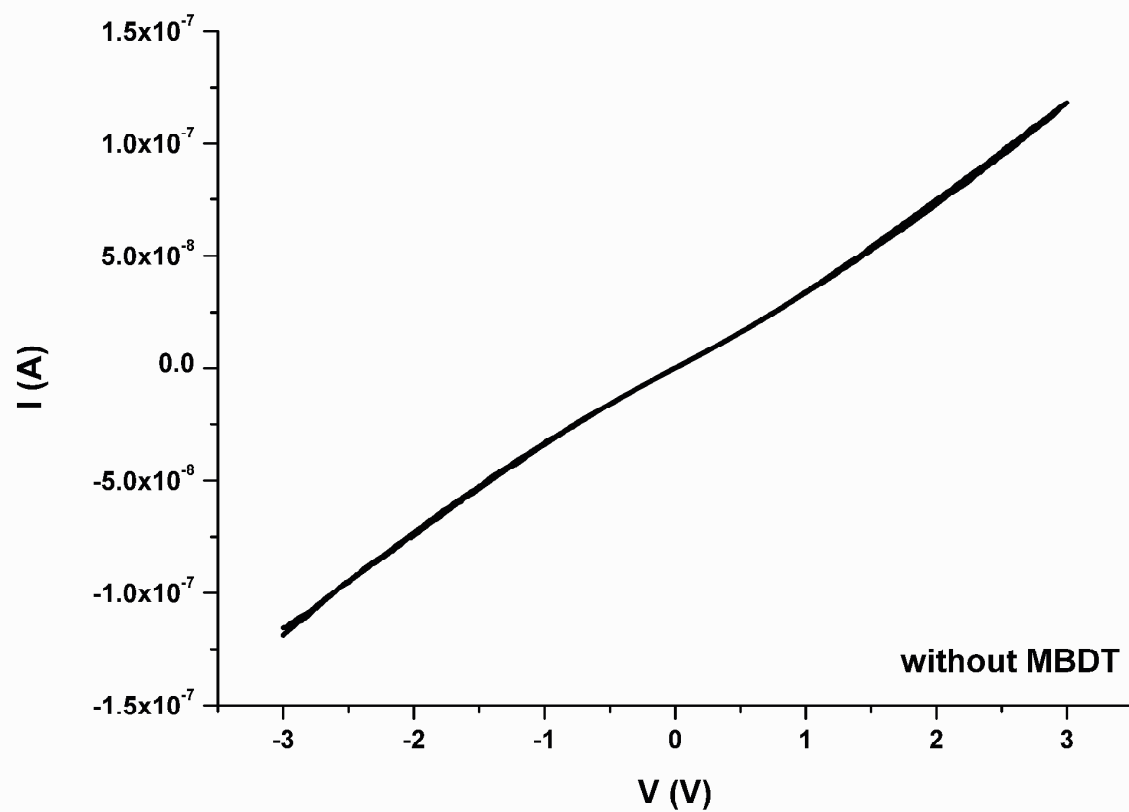

**Figure S3.** I-V characteristics of the AuNP-rGO device as a control experiment.

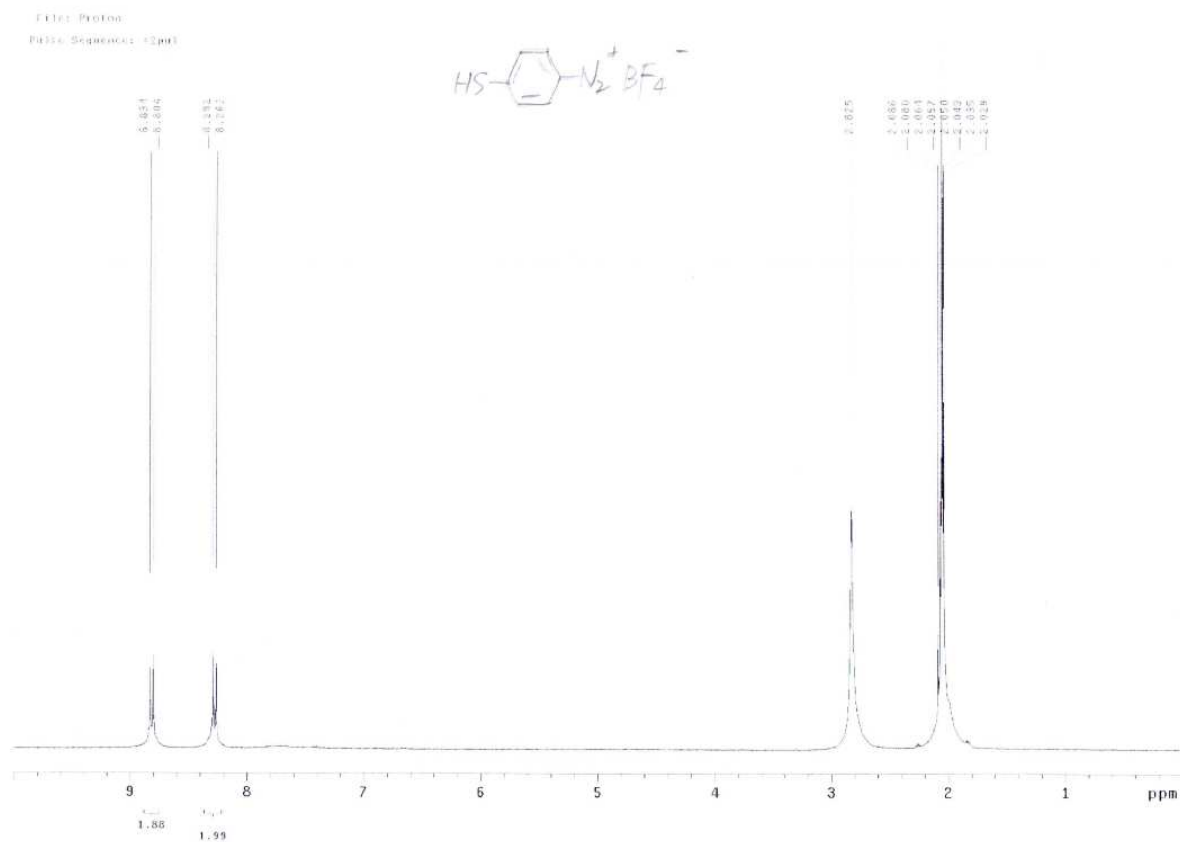

**Supporting NMR data.**  $^1\text{H}$ -NMR spectra of 4-Mercapto-benzenediazonium tetra-fluoroborate salt (MBDT).  $^1\text{H}$  NMR (300MHz, Acetone- $\text{d}_6$ ):  $\delta$ =8.262-8.292 (m, 2H), 8.804-8.834 (m, 2H).  $^1\text{H}$ -NMR spectra was obtained on a Varian 300-MR spectrometer.

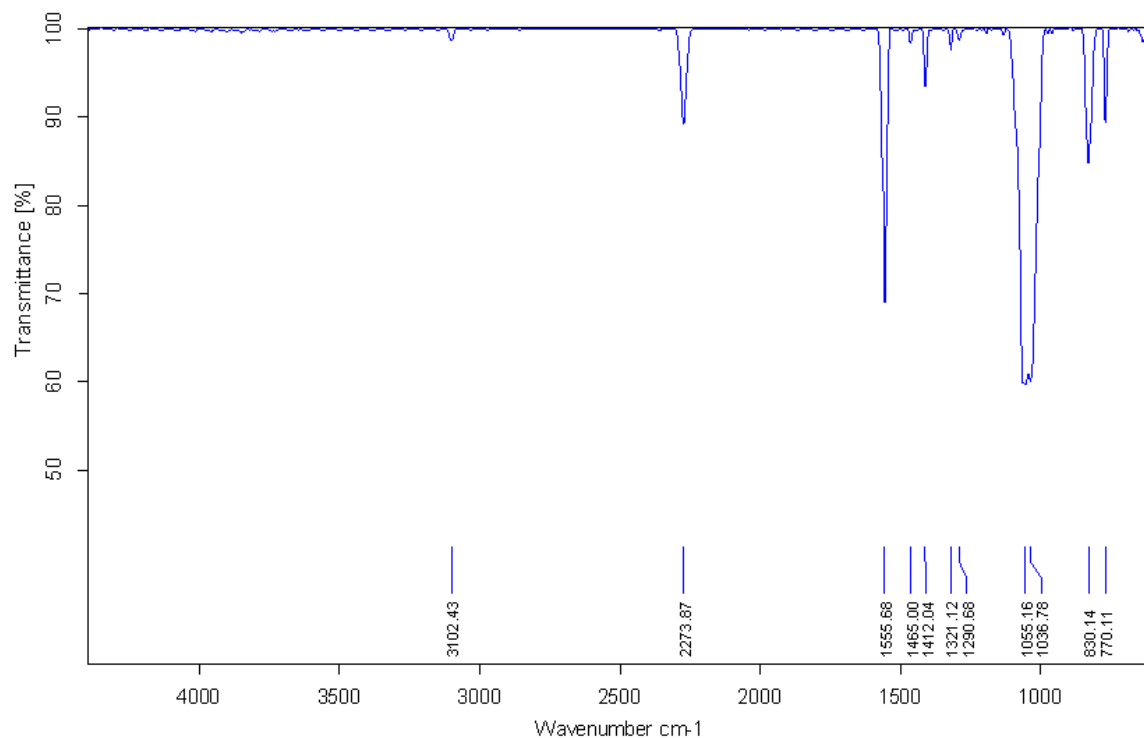

**Supporting FT-IR data.** FT-IR spectrum of MBDT; FT-IR (powder) wave number (cm<sup>-1</sup>): 770, 830, 1036, 1055, 1290, 1321, 1412, 1465, 1555, 2273, 3102. The peak at 2273.67 cm<sup>-1</sup> is the diazonium functional group.
